# Supplementary material for: Intrinsic molecular signature of breast cancer in a population-based cohort of 412 patients
Source: Springer Nature journal article supplement (doi:10.1186/bcr1517), 2006-07-17

**Supplementary Report** Intrinsic molecular signature of breast cancer  
in a population-based cohort of 412 patients  
S Calza et al.

Figure 1S: Hierarchical clustering of Stanford/Norway data based on 516 genes. Dendrogram labels and colors correspond to subtype clusters.

Figure 2S: Gene profile for the five subtypes in the Stanford/Norway data.

Figure 3S: Stockholm hierarchical clustering based on 465 genes in common with the “Intrinsic set” in Sorlie et al<sup>1</sup>. Labels and colors correspond to centroid-predicted assignment of tumor subtype.

Figure 4S Uppsala hierarchical clustering based on 465 genes in common with the “Intrinsic set” in Sorlie et al<sup>1</sup>. Colors correspond to centroid-predicted assignment of tumor subtype.

Figure 5S: Gene profile for some subtypes in the Stockholm cohort. Labels indicate the centroid label whose the sample is more correlated to and the Estrogen Receptor status.

Figure 6S: Gene profile for some subtypes in the Uppsala cohort. Labels indicate the centroid label whose the sample is more correlated to and the Estrogen Receptor status.

Figure 7S: Kaplan-Meier breast-cancer specific survival curves of the tumor subtypes in (a) Sweden with endocrine therapy, (b) Uppsala without any adjuvant therapy. The P-value, computed in a Cox regression, is for simultaneous comparison of all the curves.



Figure 2S:

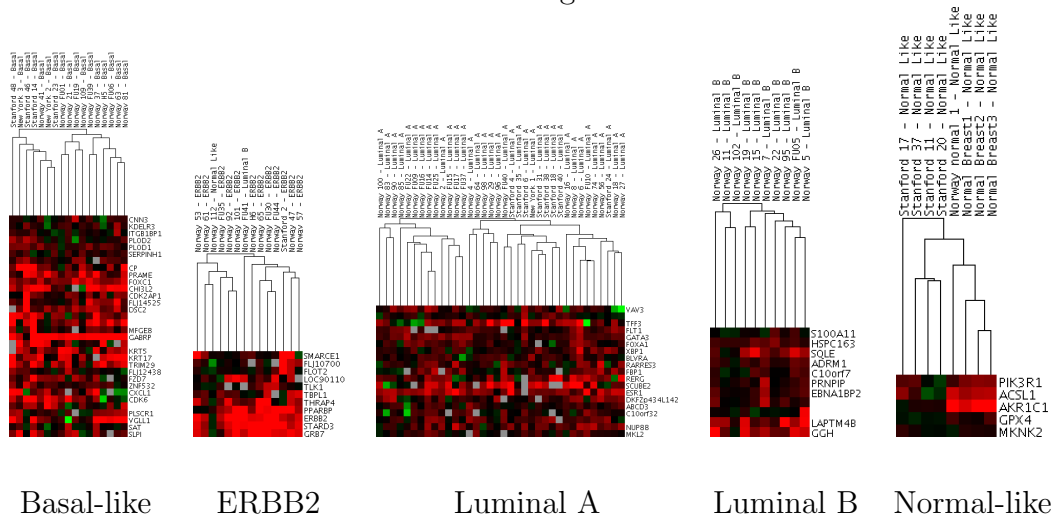

Basal-like

ERBB2

Luminal A

Luminal B

Normal-like



Figure 4S:

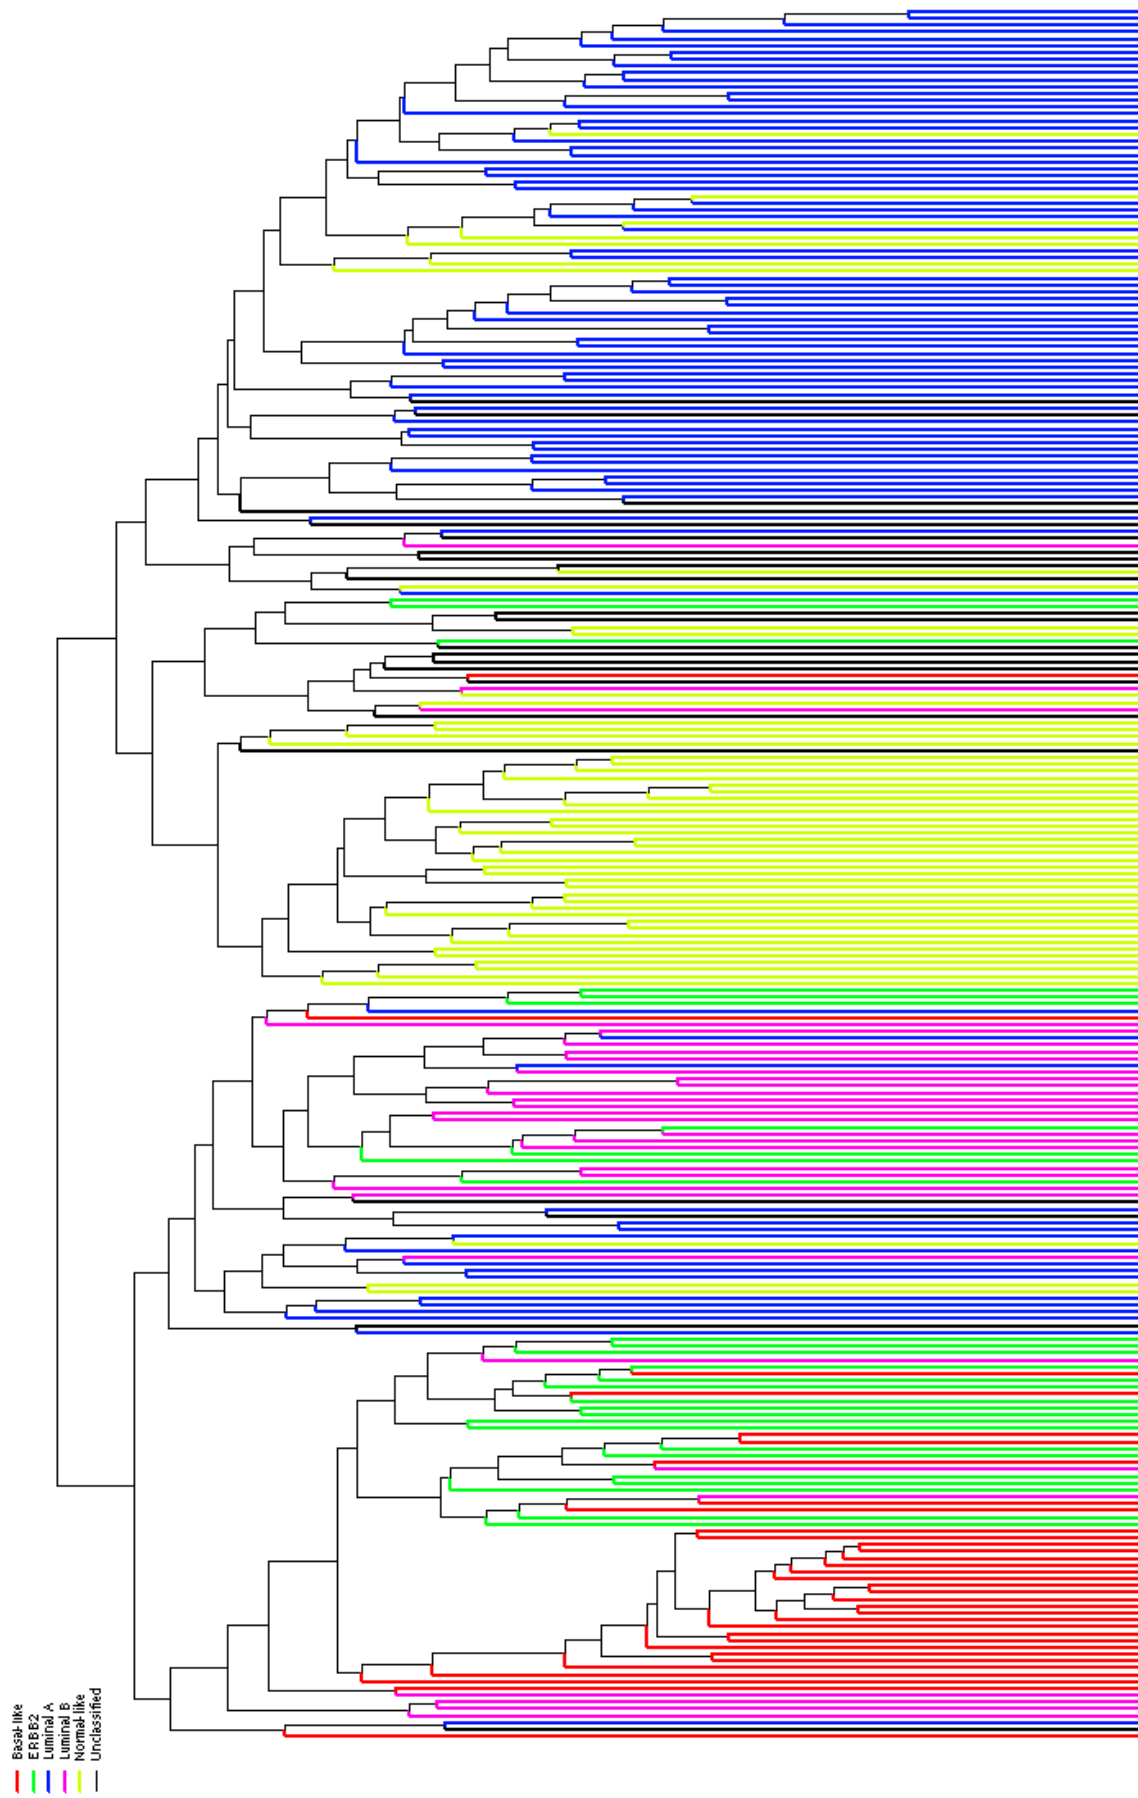

Figure 5S:

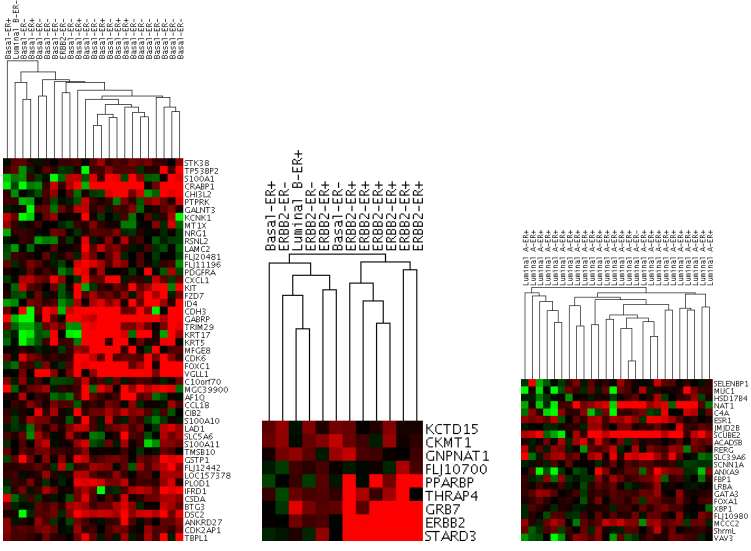

(a) Basal-like

(b) ERBB2

(c) Luminal A

Figure 6S:

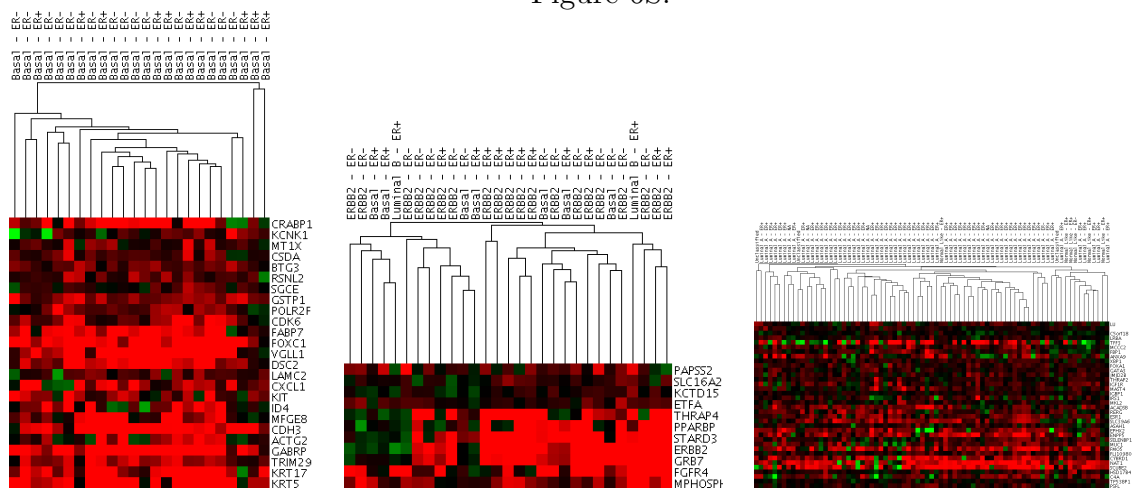

(a) Basal-like

(b) ERBB2

(c) Luminal A

Figure 7S:

(a) Patients treated with endocrine adjuvant therapy (N = 171)

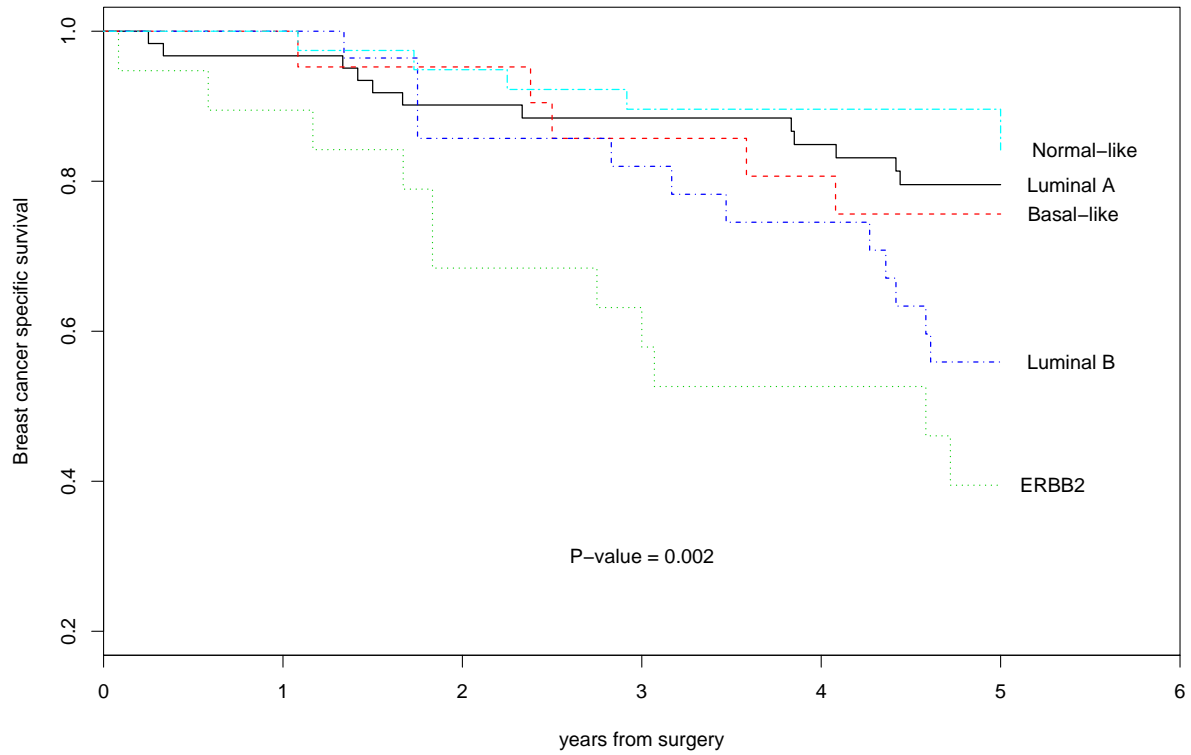

(b) Patients without any adjuvant therapy (N = 130)

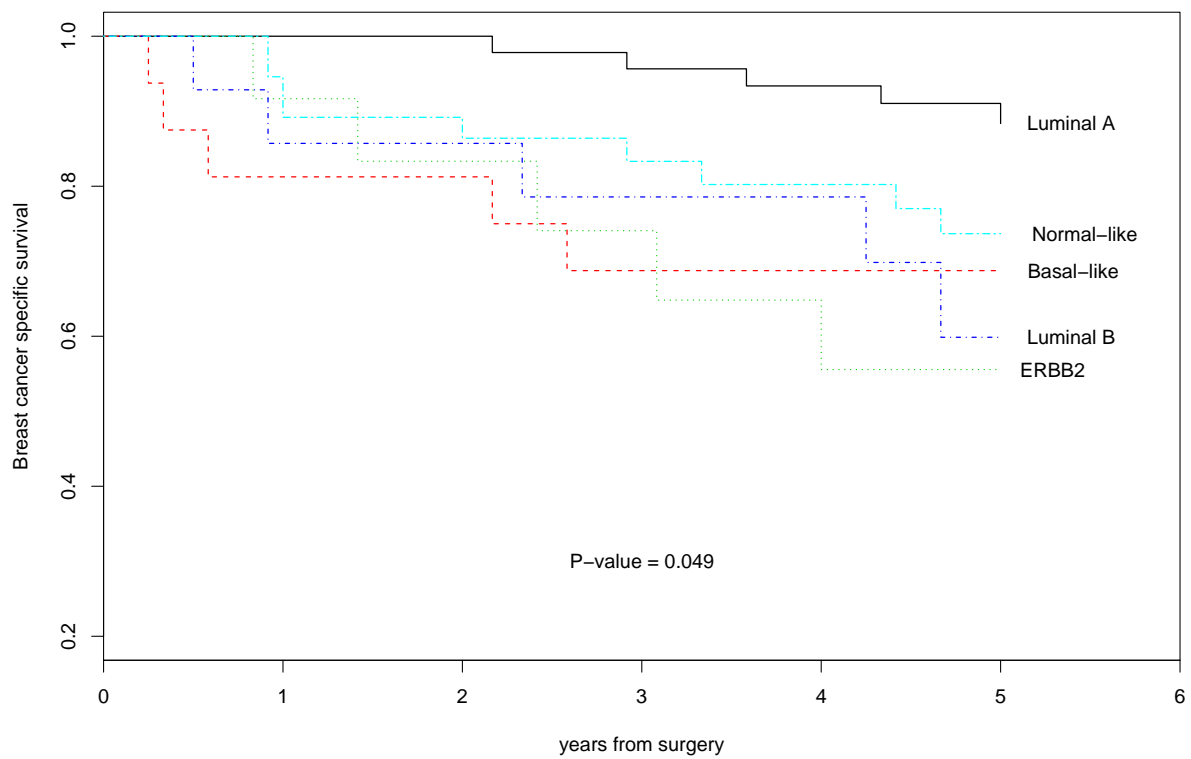

Supplement: Additional file 1 [file bcr1517-s1.pdf]
